# Supplementary material for: Technical note: Lessons from and best practices for the deployment of the Soil Water Isotope Storage System
Source: Copernicus journal article supplement (doi:10.5194/hess-27-2951-2023), 2023-08-10
Supplement: Supplementary file 1 [file hess-27-2951-2023-supplement.zip]

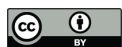

## *Supplement of*

# **Technical note: Lessons from and best practices for the deployment of the Soil Water Isotope Storage System**

**Rachel E. Havranek et al.**

*Correspondence to:* Rachel E. Havranek ([rachel.havranek@colorado.edu](mailto:rachel.havranek@colorado.edu))

- [hess-27-2951-2023-supplement-title-page.pdf](#)
- [Havranek et al Supplemental Figures.pdf](#)
- [Havranek et al., Supplemental Information.docx](#)
- [Havranek et al., Supplementary tables .xlsx](#)

The copyright of individual parts of the supplement might differ from the article licence.
