# Supplementary material for: Technical note: Lessons from and best practices for the deployment of the Soil Water Isotope Storage System
Source: Copernicus journal article supplement (doi:10.5194/hess-27-2951-2023), 2023-08-10
Supplement: Supplementary file 2 [file hess-27-2951-2023-supplement.zip]

Archive with 4 entries (4 files):
- Havranek et al Supplemental Figures.pdf
- Havranek et al., Supplementary tables .xlsx
- Havranek et al., Supplemental Information.docx
- hess-27-2951-2023-supplement-title-page.pdf
