# Supplementary material for: Technical note: Lessons from and best practices for the deployment of the Soil Water Isotope Storage System
Source: Copernicus journal article supplement (doi:10.5194/hess-27-2951-2023), 2023-08-10
Supplement: Supplementary file 2 [file hess-27-2951-2023-supplement.zip › Havranek et al., Supplementary tables .xlsx]

## Sheet: Table S1 SWISS Hardware
SWISS Hardware
Item	Source and/or Distributor	Approximate Cost (USD) *prices as of 2020, and may vary*	Location	Potential Adaptions
650 ml Flasks	Precision Glass Blowing Inc.,	$110/Flask, total = $1870	Englewood, Colorado, USA	Cost is for 17 flasks, assuming 1 is broken during building + 1 backup during deployments. Flask size and dimensions can be adapted (especially if there are weight concerns)
Valco Multiselector Valve with RS-232 communication	Valco Instruments Co. Inc.,	$2100/valve	Houston, Texas, USA	Number of selectable ports ranges from 2 - 16; communication style (e.g. RS-232) can be done in multiple ways
1/8th inch stainless steel tubing	Swagelok	$180, ~100 feet	Ohio, USA
1/4" - 1/8" union fittings	Swagelok	$17/fitting, total = $544	Ohio, USA	32 fittings / SWISS
1/4" - 1/4" union fittings	Swagelok	$13/fitting, total = $26	Ohio, USA
1/4" PTFE Fittings	Ohio Valley Specialty Co.	17/10 ferrules, total = $85	Marietta, Ohio, USA	50 ferrules
Waterproof, insulated case (61 cm x 61 cm x 61 cm with Pick n' Pluck foam)	Pelican Products Inc.	550	Torrance, CA, USA	Case size and internal configuration
1/4" push to fit bulkhead fittings	McMaster Carr	$5/fitting, $30 total
Mass Flow Controller	200 SCCM Flow Controller	$1400/controller, $2800 total	Alicat Scientific	Tuscon, Arizona, USA
Vapor Probes
Item	Part Number		Soure and/or Distributor	Loacation
Vapor Permeable Tubing	ACCURELL PP V8/2HF		3M	Germany
Vapor impermeable tubing	Bev-A-Line® IV Transfer Pump Tubing	35	Cole-Parmer	Vernon Hills, Illinois, USA
Soil temperature logger	HOBO MX2201	$69/logger	Onset Computer Corporation	Bourne, Massachusets, USA
Soil moisture Logger	S-SMD-M005	$190/probe	Onset Computer Corporation	Bourne, Massachusets, USA
Logging microstation for soil moisture	H21-USB	260	Onset Computer Corporation	Bourne, Massachusets, USA
Remote Power
12V Deep Cycle Battery	ECO-WORTHY 12V Lithium Battery, 30Ah Rechargeable LiFePO4 Lithium Ion Phosphate Deep Cycle Battery	179
12 V, 100 Watt Solar Panel	Renogy 100W 12V Monocrystalline Solar Starter Kit w/Wanderer 30A Charge Controller	87
DC to AC Power Inverter	Renogy 1000 W 12V Pure Sine Wave Inverter	210

## Sheet: Table S2 Automation Component
Item	Part (where applicable)	Source and/or Distributor	Approximate Cost (USD)	Location	Notes and Potential Adaptions
Microcontroller	Photon Wifi Development Board	Particle Industries Inc.	28	San Francisco, California, USA	Many microcontrollers are commercially available, and all have their strengths and weaknesses
Normally Closed 2 port Solenoid Valves with 1/4" push to fit fittings	VVX214BO4B, VX2A0AZ1EH, KQ2H07-36NS, KQ2H07-35NS	SMC Corporation of America	800		Voltage, push to fit fitting size, number of ports available (aka # of sampling depths)
VDC Power relay			11		Should be able to step either 3.3 V or 5V up to 12 V, widely available product
VAC Power Relay	IoT Power Relay II	Digital Loggers	30	Santa Clara, California, USA	This can be bypassed if the mass flow controller and Valco valve can be directly powered by direct current
RS-232 Shifter			11		Widely available product made by multiple manufacturers
Coin Cell Battery holder	Lilypad Coincell Battery holder	Sparkfun	2	Boulder, Colorado, USA
Data Logger	Sparkfun QWICC OpenLog	Sparkfun	19	Boulder, Colorado, USA

## Sheet: Table S3 Dry Air Test Results
SWISS	Days	H2O (ppm)	H2O Standard Dev. (ppm)		SWISS	Days	H2O (ppm)	H2O Standard Dev. (ppm)
Lindt	7	679.55	43.11		Fondue	43 Days	694.64	60.51
Lindt	7	370.6	8.79		Fondue	43 Days	1050.77	6.95
Lindt	7	351.13	7.29		Fondue	43 Days	261.98	21.8
Lindt	7	290.95	7.2		Fondue	43 Days	255.37	14.89
Lindt	7	278.26	8.83		Fondue	43 Days	222.03	11.96
Lindt	7	364.09	13.3		Fondue	43 Days	290.67	6.19
Lindt	7	287.73	7.46		Fondue	43 Days	247.56	8.84
Lindt	7	292.34	8.69		Fondue	43 Days	207.12	2.32
Lindt	7	277.07	7.62		Fondue	43 Days	407.58	25.12
Lindt	7	309.45	4.63		Fondue	43 Days	231.34	10.41
Lindt	7	464.19	20.44		Fondue	43 Days	383.08	17.9
Lindt	7	363.38	5.64		Fondue	43 Days	1083.5	13.93
Lindt	7	375.96	9.6		Rosti	34 Days	650
Lindt	7	460.33	9.86		Rosti	34 Days	290
Lindt	7	351.23	11.23		Rosti	34 Days	272
Raclette	7	533.5			Rosti	34 Days	260
Raclette	7	352.2			Rosti	34 Days	290
Raclette	7	309.8			Rosti	34 Days	1600
Raclette	7	370.6			Rosti	34 Days	810
Raclette	7	310			Rosti	34 Days	800
Raclette	7	305			Rosti	34 Days	290
Raclette	7	374			Rosti	34 Days	270
Raclette	7	292.3			Rosti	34 Days	365
Raclette	7	320.7			Rosti	34 Days	355
Raclette	7	523.3			Rosti	34 Days	320
Raclette	7	427.7			Rosti	34 Days	515
Raclette	7	267.1			Rosti	34 Days	420
Raclette	7	265.1			Toblerone	52 Days	2122.71	57.03
Raclette	7	269.1			Toblerone	52 Days	2534.53	422.26
Raclette	7	261			Toblerone	52 Days	1727.68	452.22
Toblerone	7	545.65	10.16		Toblerone	52 Days	553.97	13.08
Toblerone	7	336.16	2.3		Toblerone	52 Days	1980.99	438.13
Toblerone	7	311.21	7.23		Toblerone	52 Days	500.12	74.86
Toblerone	7	274.69	5.7		Toblerone	52 Days	2206.86	459.53
Toblerone	7	258.35	9.09		Toblerone	52 Days	1189.48	401.22
Toblerone	7	259.16	5.72		Toblerone	52 Days	1211.78	413.11
Toblerone	7	248.37	9.29		Toblerone	52 Days	1509.21	457.73
Toblerone	7	210.82	4.88		Toblerone	52 Days	482.65	17.11
Toblerone	7	206.59	6.35		Toblerone	52 Days	623.45	10.84
Toblerone	7	224.61	7.11		Toblerone	52 Days	409.7	7.68
Toblerone	7	190.16	6.73		Toblerone	52 Days	327.68	7.09
Toblerone	7	224.87	7.32		Toblerone	52 Days	422.57	9.39
Toblerone	7	180.89	4.76
Toblerone	7	173.02	5.9
Toblerone	7	171.41	6.58

## Sheet: Table S4 Water Vapor Test Res
SWISS	Days	Session	Δ δ¹⁸O (‰)	Δ δ²H (‰)
Lindt	14	2022-08-22	0.6	1.8
Lindt	14	2022-08-22	0.5	6.9
Lindt	14	2022-08-22	-0.4	0.3
Lindt	14	2022-08-22	0.5	4.8
Lindt	14	2022-08-22	0.6	4.7
Lindt	14	2022-08-22	-0.1	-0.4
Lindt	14	2022-08-22	-0.3	-0.3
Lindt	14	2022-08-22	-0.1	-0.4
Lindt	14	2022-08-22	-0.6	-0.6
Lindt	14	2022-08-22	0.5	4.9
Lindt	14	2022-08-22	0.5	4.2
Lindt	14	2022-08-22	-0.4	-0.3
Lindt	14	2022-08-22	-0.2	0.4
Lindt	14	2022-08-22	0.3	2.9
Lindt	14	2022-08-22	0.3	4.9
Raclette	14	2022-08-22	0.7	3.4
Raclette	14	2022-08-22	0	2.7
Raclette	14	2022-08-22	0	2.7
Raclette	14	2022-08-22	0	-1
Raclette	14	2022-08-22	0.3	-0.6
Raclette	14	2022-08-22	-0.2	-0.3
Raclette	14	2022-08-22	0.1	1.4
Raclette	14	2022-08-22	0.3	2.2
Raclette	14	2022-08-22	0.8	3.9
Raclette	14	2022-08-22	-0.6	-0.7
Raclette	14	2022-08-22	-0.7	-1
Raclette	14	2022-08-22	-0.3	1.1
Raclette	14	2022-08-22	-0.2	-0.7
Raclette	14	2022-08-22	-0.7	-1.1
Raclette	14	2022-08-22	-0.1	0.1
Toblerone	14	2022-08-22	-0.2	-0.2
Toblerone	14	2022-08-22	1.4	6
Toblerone	14	2022-08-22	0.3	1.5
Toblerone	14	2022-08-22	-0.4	-0.6
Toblerone	14	2022-08-22	0.9	3.1
Toblerone	14	2022-08-22	-0.1	-0.4
Toblerone	14	2022-08-22	1.3	2.5
Toblerone	14	2022-08-22	0.1	2
Toblerone	14	2022-08-22	0	-1.02e-14
Toblerone	14	2022-08-22	0	-0.3
Toblerone	14	2022-08-22	0.2	2.4
Toblerone	14	2022-08-22	0.4	3
Toblerone	14	2022-08-22	0.7	2.3
Toblerone	14	2022-08-22	0	-0.2
Toblerone	14	2022-08-22	-0.2	0.4
